# Supplementary material
Source: HighWire-hosted journal article supplement (https://qualitysafety.bmj.com/content/30/6/475)
Supplement: inline-supplementary-material-5 [file inline-supplementary-material-5.pdf]

**Supplemental File 5****LSL Workshop 1 Fidelity Checklist***To be completed by each member of the facilitation team after each visit*

Hospital: \_\_\_\_\_ Completed by: \_\_\_\_\_ Date: \_\_\_\_\_

1. Did the facilitator invest in defining a boundary around the group and supporting relationships within the guiding coalition by starting with an exercise designed to build connections between members and closing with a structured reflection session?  
Yes No
2. Did the facilitator provide an overview of the LSL rationale, objectives, intervention design, and evidence base to promote a shared starting point for the group?  
Yes No
3. Did the guiding coalition refine the objective "Reduce AMI Mortality" by defining a measure for mortality (required) and a target and timeframe (optional)? Circle all that apply  
No Measure defined Target set Timeframe defined
4. Did the facilitator provide an overview of the problem solving methodology and describe how it will be used to structure the work of the group?  
Yes No
5. Did the group identify and reflect on the various identity groups represented by members?  
Yes No
6. Did the group (1) reflect on sources of role conflict and ambiguity and (2) identify members in leadership and management roles on the guiding coalition?  
Yes, both Reflection only Role definition only Neither
7. Did the group establish decision-making norm(s) to guide their work?  
Yes, agreed upon Discussed, no conclusion Not discussed
8. Did the group reflect on baseline measures of practices and culture associated with reduced mortality?  
Yes No
9. Did the group generate root causes of mortality, begin to prioritize root causes, and identify next steps to complete the root cause analysis as needed (i.e., follow-up for additional data, validation of hypotheses)?  
Yes No
10. Did the facilitator present theory and promote reflection on managing conflict productively?  
Yes No
11. Did the group identify concrete ways that they will hold each other accountable and be held accountable?  
Yes No
12. Did the group identify key next steps to take between now and the next workshop with the goal of selecting a strategy and preparing to report on implementation and evaluation in 6 months?  
Yes No
13. Because the workshops are designed with the flexibility required to fit the local context, is there anything else we should know about ways in which this workshop may have deviated from the standard/planned curriculum?
